# Supplementary material for: Robotic modelling of snake traversing large, smooth obstacles reveals stability benefits of body compliance
Source: PubMed Central journal article supplement (PMC7062058; doi:10.1098/rsos.191192), 2020-02-19
Supplement: rsos191192supp1.pdf [file rsos191192supp1.pdf]

1 **Robotic modeling of snake traversing large, smooth obstacles reveals stability benefits of body**  
2 **compliance**

3 **Supplemental Material**

4 *Royal Society Open Science*

5 Qiyuan Fu, Chen Li\*

6 Department of Mechanical Engineering, Johns Hopkins University, Baltimore, Maryland, USA

7 \*Corresponding author. E-mail: [chen.li@jhu.edu](mailto:chen.li@jhu.edu)

8 **Materials and Methods**

9 **Robot parts**

10 The robot was actuated with 19 Dynamixel XM430-W350-R servo motors operating at 14 V,  
11 powered by an external DC power supply (TekPower, CA, USA). The rubber O-rings wrapping each wheel  
12 were oil-resistant soft buna-n O-rings with an outer diameter of 48.1 mm and a width of 5.3 mm (McMaster-  
13 Carr, Elmhurst, IL, USA). The springs used in the suspension were compression springs with a length of  
14 9.5 mm and an outer diameter of 3.1 mm (McMaster-Carr, Elmhurst, IL, USA). The maximal compression  
15 of each spring was 5 mm, which, when amplified by the lever arm (Fig. 2, red), limited the suspension  
16 deformation of each wheel to within 10 mm.

17 **Large step obstacle track**

18 We constructed a 180 cm long, 120 cm wide obstacle track using extruded T-slotted aluminum and  
19 acrylic sheets (McMaster-Carr, Elmhurst, IL, USA) (Fig. S1A). The step spanned the entire width of the  
20 track. To reduce slipping of the robot, we covered the horizontal surfaces of the step with a high friction  
21 rubber sheet (EPDM 60A 1.6 mm thick rubber sheet, Rubber-Cal, CA, USA).

22 **Friction measurement**

23 In friction experiments, we measured the position as a function of time of three body segments  
24 being dragged by a weight, by tracking ArUco tags in videos captured by Logitech C920 webcam at 30  
25 frames/s. Then, by fitting a quadratic function of displacement as a function of time to estimate acceleration,  
26 we calculated kinetic friction coefficient as:

27 
$$\mu = \frac{m_2 g - (m_1 + m_2) a}{m_1 g}$$

28 where  $m_1$  is the mass of the weight,  $m_2$  is the total mass of the segments,  $a$  is the fitted acceleration,  $g$  is the  
 29 local gravitational acceleration (9.81514 m/s<sup>2</sup>).

30 **Motor actuation to achieve partitioned gait**

31 The actuation profile of yaw joints in the laterally undulating body sections, defined as the angular  
 32 displacement from the straight body pose (Fig. 2B, yellow angle) as a function of time and segment index,  
 33 followed the serpenoid gait [18]:

34 
$$\theta_i = \begin{cases} A \sin(\omega t + \phi + (i - 1)\Delta\phi), & i = 1, 2, \dots, k_1 \\ A \sin(\omega t + \phi + (i + k_1 - k_2)\Delta\phi), & i = k_2, \dots, 9 \end{cases}$$

35 where  $i$  is for the  $i$ th yaw joint from the robot head,  $A = \pi/6$  and  $\omega = \pi/2$  are the amplitude and angular  
 36 velocity of each yaw joint angle waveform,  $\phi = 0$  is the initial phase (at time zero) of the first yaw joint,  
 37 and  $\Delta\phi = -\pi/4$  is the phase difference between adjacent yaw joints.  $\Delta\phi$  determines the wavenumber of the  
 38 entire serpenoid wave in the robot,  $k = 9|\Delta\phi|/2\pi$ . The  $k_1$ th yaw joint is the last yaw joint in the undulating  
 39 section above the step, and the  $k_2$ th yaw joint is the first yaw joint in the undulating section below the step,  
 40  $k_2 - k_1$  is the number of pitch segments in the cantilevering section. The pitch angles of all pitch segments  
 41 in these two undulating sections were set to zero (Fig. S2A, gray) to maintain contact with the horizontal  
 42 surfaces.

43 The actuation profile of the joints of the cantilevering section (Fig. S2A, red) was designed to  
 44 bridge across the large step with the minimal number of segments necessary. The yaw angles of all yaw  
 45 segments in this section were set to zero. The pitch angle of the most anterior pitch joint in the undulating  
 46 section below (Fig. S2A, joint c) was set to its maximal possible value  $\phi_{\max}$  so that the cantilevering section  
 47 was as vertical as possible to minimize cantilevering length. The two most anterior pitch joints in the  
 48 cantilevering section (Fig. S2A, joints a and b) were set to keep the section above in contact with the upper  
 49 horizontal surface. Their pitch angles were calculated as follows:  $\phi_a = \phi_b - \phi_{\max}$ ,  $\phi_b = -\sin^{-1}[(H -$   
 50  $n h \sin\phi_{\max})/L]$ ,  $n = \text{floor}[H/(h \sin\phi_{\max})]$ , where  $H$  is step height,  $h$  is the distance between two adjacent pitch

51 axes when the robot is straight,  $n$  the maximum number of pitch and yaw segments that can be kept straight  
52 in the cantilevering section.

### 53 **Marker-based feedback logic control**

54 For feedback logic control [40] of the robot, a  $3 \times 3$  cm ArUco marker [64] was fixed to the top of  
55 each pitch segment and on both the upper and lower horizontal surfaces near the top and bottom edge of  
56 the step (Fig. S1B). Their positions captured by a camera were tracked before each trial to measure the step  
57 height for adjusting the robot gait and then tracked online to locate the position of each pitch segment  
58 relative to the step. We used a webcam (C920, Logitech, Lausanne, Switzerland) with  $1920 \times 1080$   
59 resolution for experiments with step height  $H \leq 38\% L$ . We used another camera (Flea3, FLIR, OR, USA)  
60 with  $1280 \times 1024$  resolution and a 12.5 mm lens (Fujinon CF12.5HA-1, Fujifilm, Minato, Japan) for  
61 experiments with  $H > 38\% L$  because the webcam could not capture the entire setup with its limited focus  
62 length and angle of view.

63 The snake robot was controlled by a custom Robot Operating System (ROS) package running on  
64 an Ubuntu laptop connected with the online camera and a power sensor system to measure electrical power  
65 consumption (see below) (Fig. S2B). The laptop sent joint position commands to the servo motors and  
66 received motor angle readings at around 20 Hz. The online camera sent images to the laptop for online  
67 tracking of the ArUco markers at 20 Hz.

68 The feedback logic control algorithm is shown in flow chart (Fig. S2C). Before entering the main  
69 loop of online servo motor control at 25 Hz (in ROS time), the actuation profile of pitch segments was first  
70 calculated based on the step height acquired. In each control loop, the controller determined whether section  
71 division needed to be propagated down the body by checking: (1) whether the middle point of the motor  
72 axle line segment of the most posterior pitch segment in the cantilevering section had crossed a vertical  
73 plane 4 cm before and parallel to the vertical surface of the step but was no higher than 10 cm above the  
74 upper horizontal surface; or (2) whether the middle point of the motor axle line segment of the most anterior  
75 pitch segment in the undulating section below the step had crossed a vertical plane 12 cm before and parallel  
76 to the vertical surface of the step. If either was true, the controller calculated the updated joint angles and

77 sent angle commands to the servo motors. The controller continued this loop until a termination signal sent  
78 by the experimenter was received.

### 79 **Electrical power measurement**

80 We used two current sensors (Adafruit, NY, USA) between the servo motors and the power supply  
81 to record both voltage and current and measure electrical power of the robot (Fig. S3) at 100-135 Hz. The  
82 two sensors were installed on the power cord near the power supply in parallel to accommodate the large  
83 current drawn. The DC current and voltage data were sent to the laptop for recording with timestamps via  
84 an Arduino-based Single Chip Processor (SCP) communicating with the laptop.

### 85 **Data synchronization**

86 To synchronize motor angle data and electrical power data recorded by the laptop with the high-  
87 speed camera videos recorded on a desktop server, the power measurement circuit included a switch to turn  
88 on/off an LED bulb placed in the field of view of the high-speed cameras. When the LED was switched  
89 on/off, the SCP detected the voltage increase/drop and began/stopped recording power data. By aligning  
90 the initial and final power data points with the LED on/off frames in the videos and interpolating the motor  
91 position and electrical power data to the same sampling frequency as high-speed video frame rate (100 Hz),  
92 these data were synchronized.

### 93 **Experiment protocol**

94 At the beginning of each trial, we placed the robot on the surface below the step at the same initial  
95 position and orientation. The robot was set straight with its body longitudinal axis perpendicular to the  
96 vertical surface of the step. Its distance was set to be 16.5 cm from the wheel axle of the first segment to  
97 the vertical surface. This distance was selected so that the forward direction of most anterior segment in the  
98 undulating section below the step was perpendicular to the vertical surface before it began to cantilever.  
99 We then started high-speed video recording and switched on the LED in the SCP circuit. Next, we started  
100 the robot motion and monitored traversal progress until a termination condition was met. After the robot  
101 motion was terminated, the LED was first switched off, then the high-speed camera recording was stopped,  
102 and the setup was reset for the next trial while high speed videos were saved.

### 103 **3-D kinematics reconstruction**

104 To reconstruct 3-D kinematics of the entire robot traversing the large step obstacle, we recorded  
105 the experiments using twelve high-speed cameras (Adimec, Eindhoven, Netherlands) with a resolution of  
106  $2592 \times 2048$  pixels at  $100 \text{ frames s}^{-1}$  (Fig. S1A). The experiment arena was illuminated by four 500 W  
107 halogen lamps and four LED lights placed from the top and side.

108 To calibrate the cameras over the entire working space for 3-D reconstruction, we built a three  
109 section, step-like calibration object using T-slotted aluminum and Lego Duplo bricks (The Lego Group,  
110 Denmark). The calibration object consisted of 23 landmarks with 83 BEEtags [65] facing different  
111 directions for automatic tracking. We then used the tracked 2-D coordinates of the BEEtag center points  
112 for 3-D calibration using Direct Linear Transformation (DLT) [66]. To obtain 3-D kinematics of the robot  
113 relative to the step, we used the 10 ArUco markers attached to the robot (one on each pitch segment), the  
114 two attached near the top and bottom edge of the step, and 13 additional ones temporarily placed on the  
115 three step surfaces before the first trial of each step height treatment. After all the experiments, we used a  
116 custom C++ script to track the 2-D coordinates of the corner points of each ArUco marker in each camera  
117 view. We checked and rejected ArUco tracking data whose four marker corners did not form a square shape  
118 with a small tolerance (10% side length).

119 Using the tracked 2-D coordinates from multiple camera views, we obtained 3-D coordinates of  
120 each tracked marker via DLT using a custom MATLAB script. We rejected marker data where there was  
121 an unrealistic large acceleration ( $> 10 \text{ m/s}^2$ ), resulting from a marker suddenly disappearing in one camera  
122 view while appearing in another in the same frame. We then obtained 3-D position and orientation of each  
123 pitch segment by offsetting its marker 3-D position and orientation using the 3-D transformation matrices  
124 from the marker to the segment, which was measured from the CAD model of the robot. We also measured  
125 the step geometry by fitting a plane to the markers on each of its three surfaces and generated a point cloud  
126 using the fit equation and the dimension of the three surfaces.

127 For yaw segments without markers and the pitch segments whose markers were not tracked due to  
128 occlusions or large rotation, we inferred their 3-D positions and orientations using kinematic constraints.

129 We first tried inputting motor angles recorded by these segment motors into the robot forward kinematics  
130 to solve for their transformation matrices from other reconstructed segments. If their motor angles were not  
131 properly recorded, we tried inferring their positions and orientations from the two adjacent segments (as  
132 long as they were reconstructed). To do so, we first obtained all servo motor angles in this missing section  
133 by solving an inverse kinematics problem, then derived the transformation matrices of the missing segments  
134 from the forward kinematics. Finally, if both methods failed, we interpolated temporally from adjacent  
135 frames to fill in the missing transformation matrices. The interpolation was linearly applied on the twists of  
136 transformation matrices. We compared joint angles from the reconstructed segments to motor position data  
137 and rejected those with an error larger than  $10^\circ$ . To reduce high frequency tracking noise, we applied a  
138 window average filter temporally (*smooth2a*, averaging over 11 frames) to the 3-D positions of each  
139 segment after reconstructing all segments.

140 We verified the fidelity of 3-D kinematics reconstruction by projecting reconstruction back onto  
141 the high-speed videos and visually examined the match (Fig. S1B). The thresholds used in this process were  
142 selected by trial and error, with the aim of removing substantial visible projection errors while rejecting as  
143 few data as possible.

#### 144 **Data analysis**

145 To quantify traversal performance, we measured traversal probability defined as the ratio of the  
146 number of trials in which the entire robot reached the surface above the step to the total number of trials for  
147 each step height. To quantify roll instability, we measured roll failure (flipping over) probability, defined  
148 as the ratio of the number of failed trials in which the robot flipped over due to rolling to the total number  
149 of trials for each step height. To determine whether a wheel contacted a surface, we examined whether any  
150 point in the wheel point cloud (Fig. 8B, grey dashed circle) penetrated the surface assuming no suspension  
151 compression. Unrealistic body deformation values from tracking errors larger than the 10 mm limit from  
152 the mechanical structure were set to 10 mm.

153 To compare electrical power during traversal across step height and body compliance treatments,  
154 we analyzed electrical power over the traversal process, defined as from when the first pitch segment lifted

155 to cantilever, to when the last pitch segment crossed the top edge of the step for successful trials, or to when  
156 the robot flipped over (roll failure) or the trial was terminated due to robot getting stuck (stuck failure) for  
157 failed trials.

158 To compare traversal performance of our robot with previous snake robots and the kingsnake, we  
159 calculated vertical traversal speed for each robot and the animal. For our snake robot and the kingsnake  
160 with multiple trials, we first calculated vertical traversal speed of each trial by dividing step height  
161 normalized to body length by traversal time and then pooled speed data of all trials from all step heights for  
162 each body compliance treatments (for the robot) to obtain average speed. The slopes shown in Fig. 9 are  
163 average vertical traversal speed for each robot and the animal.

164 During experiments, we rejected trials in which the robot moved out of the obstacle track before  
165 successfully traversing the step or failing to traverse due to occasional crash of the control program. We  
166 collected around 10 trials for each combination of step height and suspension setting (rigid and compliant).  
167 For the rigid body, 40%  $L$  step treatment only 5 trials were collected, because the 3-D printed segment  
168 connectors were often damaged by ground collisions during roll failure (flipping over) and had to be  
169 replaced. Detailed sample size is shown in Table S1.

170 **Table S1. Sample size.**

|           | $H = 31\% L$ | $H = 36\% L$ | $H = 38\% L$ | $H = 40\% L$ |
|-----------|--------------|--------------|--------------|--------------|
| Rigid     | 10           | 8            | 10           | 5            |
| Compliant | 10           | 11           | 10           | 10           |

171 Records of traversal success and roll failure (flipping over) were binomial values (1 for success and  
172 0 for failure) for each trial and averaged across trials to obtain their probabilities for each step height and  
173 body compliance treatment. For each trial, contact probability, body deformation, and surface conformation  
174 difference were averaged spatiotemporally over time and across all pitch segments in the undulating  
175 sections above and below the step combined. Electrical power was averaged over time for each trial. Finally,  
176 these trial averages were further averaged across trials for each step height and body compliance treatment

177 to obtain treatment means and standard deviations (s.d.) or confidence intervals, which are reported in  
178 figures.

179 To test whether traversal probability and roll failure (flipping over) probability depended on step  
180 height, for the rigid or compliant body robot, we used a simple logistic regression separately for each of  
181 these measurements, with step height as a continuous independent factor and records of traversal success  
182 or roll failure (flipping over) as a nominal dependent factor.

183 To test whether traversal probability and roll failure (flipping over) probability further depended  
184 on body compliance while taking into account the effect of step height, we used a multiple logistic  
185 regression for each of these measurements with data from rigid and compliant body robot combined, with  
186 body compliance as a nominal independent factor and step height as a continuous independent factor and  
187 records of traversal success or roll failure (flipping over) as a nominal dependent factor.

188 To test whether traversal probability differed between each adjacent pair of step heights for the  
189 rigid or compliant body robot, we used a pairwise chi-square test for each pair of step heights, with step  
190 height as a nominal independent factor and traversal success record as a nominal dependent factor.

191 To test whether contact probability, body deformation, surface conformation difference, and  
192 electrical power differed between rigid and compliant body robot, we used an ANCOVA for each of these  
193 measurements. We first set body compliance, step height, and their interaction term as independent factors  
194 and each of these measurements as a nominal/continuous dependent factor. If the  $P$  value of the interaction  
195 term was less than 0.05, we then re-ran the same test excluding the interaction term.

196 All the statistical tests followed the SAS examples in [67] and were performed using JMP Pro 13  
197 (SAS Institute, Cary, NC, USA).



198 **Supplementary Figures**

199

200

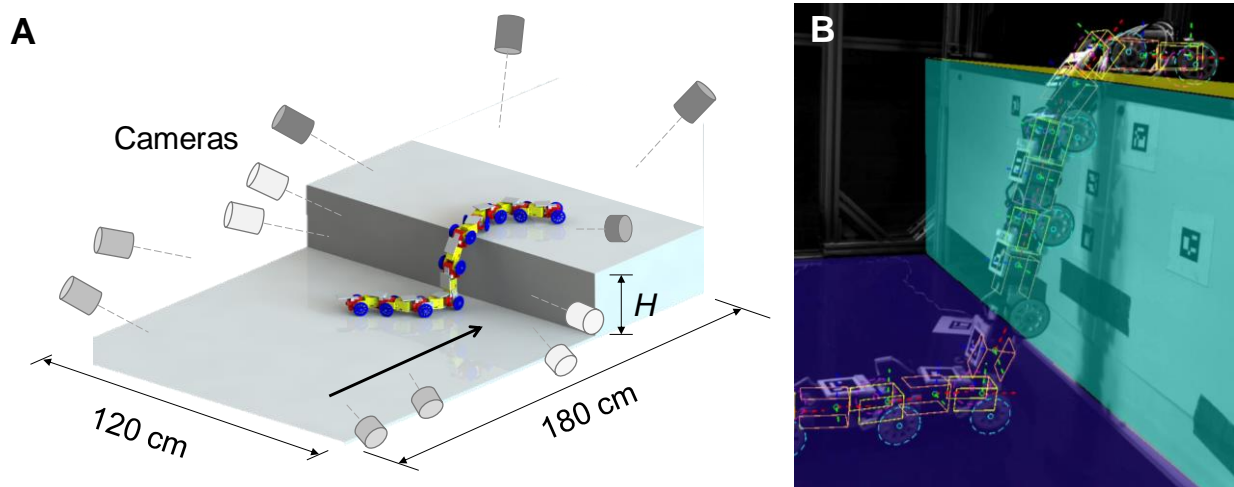

201

202 **Fig. S1. Experimental setup and 3-D kinematics reconstruction.** (A) Schematic of experimental setup.

203 Twelve high-speed cameras are used for 3-D kinematics reconstruction, divided into groups of four

204 (different shades) focusing on three step surfaces. (B) High-speed video snapshot of robot traversing step,

205 with projection of reconstructed body segments, wheels, and step surfaces. Yellow and orange boxes are

206 reconstructed yaw and pitch servo motors. Dashed magenta and cyan circles are reconstructed left and right

207 wheels assuming no suspension compression. Violet, cyan, and gold surfaces are reconstructed lower

208 horizontal, vertical, and upper horizontal surfaces.

209

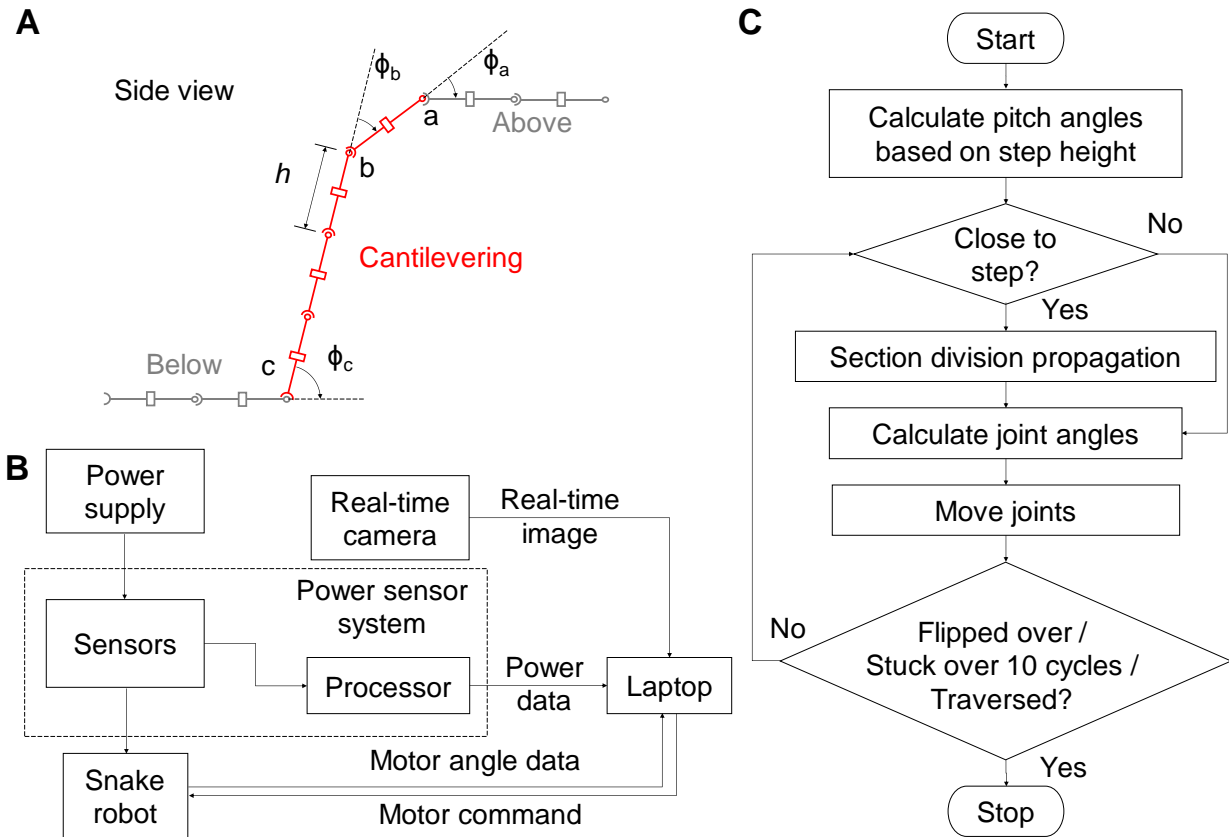

210

211 **Fig. S2. Controller design.** (A) Side view schematic of partitioned gait design to show control of  
 212 cantilevering section (red). Three pitch angles are calculated based on measured step height, including:  $\phi_a$   
 213 and  $\phi_b$  of the two most anterior pitch joint of the cantilevering section and  $\phi_c$  of the most anterior pitch joint  
 214 of the undulating section below the step. (B) Data acquisition system. (C) Flow chart of robot control. For  
 215 (B) and (C), see **Section 2.2** in main text and **Marker-based feedback logic control** and **Electrical power**  
 216 **measurement** in Materials and Methods for detailed description.

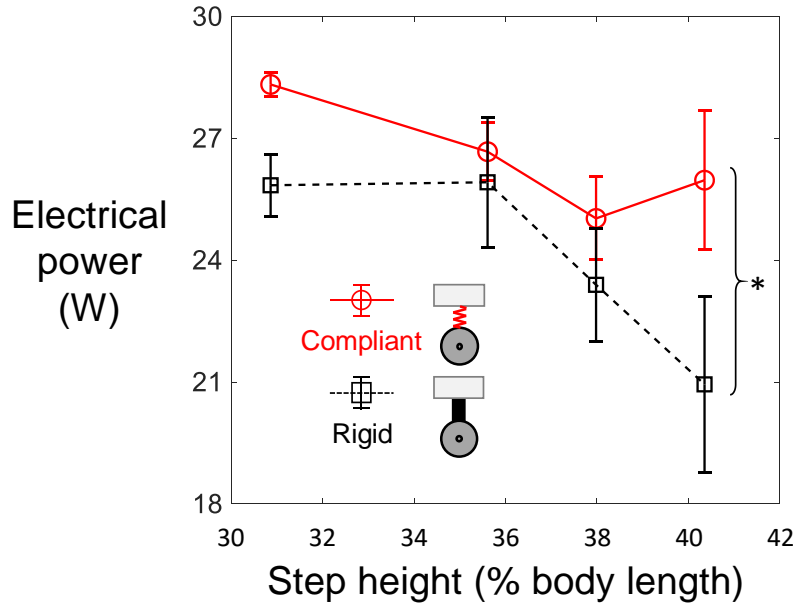

217

218 **Fig. S3. Effect of body compliance on electrical power.** Electrical power of robot as a function of step  
 219 height. Black dashed is for rigid body robot; red solid is for compliant body robot. Error bars show  $\pm 1$  s.d.  
 220 Bracket and asterisk represent a significant difference between rigid and compliant body robot ( $P < 0.0001$ ,  
 221 ANCOVA).

222

223 **Supplementary Movies**

224 **Movie 1.** Mechanical design of snake robot.

225 **Movie 2.** Comparison of large step traversal between rigid and compliant body snake robot.

226 **Movie 3.** Adverse events of snake robot traversing a large step.
